# Supplementary material
Source: HighWire-hosted journal article supplement (http://bmjopenquality.bmj.com/highwire/filestream/145930/field_highwire_adjunct_files/0/bmjoq-2022-002035supp001_data_supplement.pdf)
Supplement: bmjoq-2022-002035supp001_data_supplement.pdf [file bmjoq-2022-002035supp001_data_supplement.pdf]

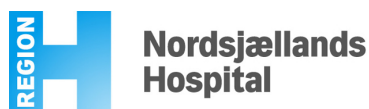

Nordsjællands  
Hospital

# Hyperemesis gravidarum

## Patientinformation om kvalmestillende medicin

Der findes forskellige muligheder for kvalmestillende medicin. Disse er beskrevet nedenfor. Der kan godt gives mere end et præparat ad gangen, og effekten af en iværksat behandling kan vurderes efter ca. 3 dage.

Det tilrådes at forsøge udtræning hver anden uge efter graviditetsuge 16.

### Pyridoxin (B6 vitamin)

Ca. 25mg 3 gange dagligt (max døgndosis 100mg).

Bivirkninger: Ingen relevante

Sikkerhed: Grundigt undersøgt uden overhyppighed af misdannelser.

### Postafen (meclozin) 25mg 2 gange dagligt eller **Marzine/Gotur** (cyclizin) 50mg 3 gange dagligt

Bivirkninger: Hyppigste er døsighed.

Sikkerhed: Grundigt undersøgt uden overhyppighed af misdannelser. Bør ikke anvendes de sidste 2 uger før termin pga. risiko for påvirkning af det nyfødte barn.

### Metoclopramid

10mg 3 gange dagligt eller ved behov

Bivirkninger: Yderst lille risiko for udvikling af parkinsonlignende bevægeforstyrrelser (ekstrapyramidale bivirkninger). Ved forekomst skal behandlingen stoppes og læge kontaktes.

Sikkerhed: Grundigt undersøgt uden overhyppighed af misdannelser. Bør ikke anvendes de sidste 2 uger før termin pga. risiko for påvirkning af det nyfødte barn.

### Ondansetron

4-8 mg 2-4 gange dagligt (max døgndosis 32mg). Fås også som smeltetablet.

Bivirkninger: Hyppigst hovedpine, hård mave og rødme og varmekølehed.

Sikkerhed: Ganske let øget risiko for læbeganespalte ved behandling med ondansetron i første trimester. Den øgede forekomst svarer til en stigning på 3 tilfælde per 10.000 behandlede (11 tilfælde/10.000 som ikke har fået ondansetron og 14/10.000 ondansetron behandlede).

### Prometazin

25 mg 2-4 gange dagligt

Bivirkninger: Hyppigste er udtalt døsighed, hvilket er årsagen til, at det sjældent bruges.

Sikkerhed: Grundigt undersøgt uden overhyppighed af misdannelser.

Bør ikke anvendes de sidste 2 uger før termin pga. risiko for påvirkning af det nyfødte barn.
